# Supplementary material
Source: Springer Nature journal article supplement (https://www.springermedizin.de/resource/supplementary/12985_2007_404_MOESM1_ESM.pdf/9608006)

# L10

Tai

L4

15

20

37

42

das

das

das

das

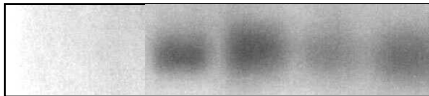

*gus* siRNA

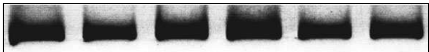

rRNA

Supplement: MOESM1 [file 9608006]
